# Supplementary material for: Non-destructive Determination of Shikimic Acid Concentration in Transgenic Maize Exhibiting Glyphosate Tolerance Using Chlorophyll Fluorescence and Hyperspectral Imaging
Source: Front Plant Sci. 2018 Apr 9;9:468. doi: 10.3389/fpls.2018.00468 (PMC5900420; doi:10.3389/fpls.2018.00468)
Supplement: Supplementary file 4 [file Table_1.DOCX]

Supplementary Material

Non- destructive determination of shikimic acid concentration in transgenic maize exhibiting glyphosate tolerance using chlorophyll fluorescence and hyperspectral imaging

Xuping Feng1, Chenliang Yu2, Yue Chen3, Jiyun Peng1, Lanhan Ye1, Tingting Shen1, Haiyong Wen1, Yong He1*

1Key Laboratory of Spectroscopy, Ministry of Agriculture, College of Biosystems Engineering and Food Science, Zhejiang University, Hangzhou 310058, China

2Vegetable Research Institute, Zhejiang Academy of Agricultural Sciences, Hangzhou 310021, China

3Institute of horticulture, Zhejiang academy of agricultural science, Hangzhou 310021, China

*** Correspondence:** Yong He: yhe@zju.edu.cn

**Supplementary Table 1.** Prediction results of the pre-processing models constructed by partial least-squares regression (PLSR) based on spectral information for shikimic acid concentration

| Model type | Par[a] | Calibration set | | Prediction set | |
| --- | --- | --- | --- | --- | --- |
| *R*2 c | *RMSEC* | *R*2 p | *RMSEP* |
| MSC–PLSR | 7 | 0.73 | 15.24 | 0.73 | 15.09 |
| WT–PLSR | 9 | 0.81 | 14.74 | 0.82 | 6.78 |
| SG–PLSR | 8 | 0.73 | 14.10 | 0.76 | 14.66 |
| SNV–PLSR | 10 | 0.80 | 12.75 | 0.80 | 12.21 |

[a]Model parameters indicate the optimal number of latent variables for establishing the PLSR calibration model; *R*2 c and *R*2 p, coefficients of determination for calibration and prediction sets, respectively; *RMSEC* and *RMSEP*, root mean square errors of calibration and prediction sets, respectively; SNV, standard normal variate; SG, Savitzky-Golay smoothing; MSC, multiplicative scatter correction; WT, wavelet transformation
